# Supplementary material for: Genome-wide analysis of Aux/IAA gene family in Solanaceae species using tomato as a model
Source: Springer Nature journal article supplement (doi:10.1007/s00438-012-0675-y), 2012-02-06
Supplement: MOESM7 [file 438_2012_675_MOESM7_ESM.xls]

## Sheet: Sheet1
Gene		Treatment
	0	AXUIN(h)			Salt(h)			Drought(h)			Heat(h)
		0.5	1	3	1	6	12	1	6	12	0.5	1
AtIAA1	1	4.96	5.29	5.38	1.29	1.57	0.87	2.17	1.23	0.81	0.8	1.91
AtIAA2	1	5.22	7.28	8.17	1.31	1	0.9	1.71	0.91	0.7	0.57	1.83
AtIAA3	1	2.21	2.81	1.52	1.08	1.44	1.5	0.98	1.27	1.02	0.32	0.85
AtIAA4	1	1.67	1.83	2.35	1.05	0.46	1.01	0.97	0.73	0.81	0.98	0.75
AtIAA5	1	28.58	94.27	46.56	1.44	4.42	0.77	2.19	2.21	0.76	1	1.87
AtIAA6	1	6.5	6.91	8.33	1.15	0.77	0.83	2.37	0.75	0.47	0.61	0.63
AtIAA7	1	1.17	1.09	2.08	0.91	0.6	0.55	0.69	1.25	0.74	0.87	0.92
AtIAA8	1	1.02	0.98	1.17	1.11	0.82	0.94	1.14	0.88	1.03	1.18	0.95
AtIAA9	1	1.07	1.49	1.78	1.18	1.06	1.12	0.96	0.89	0.96	1.23	0.73
AtIAA10	1	1.27	1.86	1.4	1.16	1.61	0.84	0.99	1.31	0.88	0.91	0.49
AtIAA11	1	2.83	3.46	2.32	1.01	1.15	1.6	0.82	1.14	0.99	1.18	0.86
AtIAA12	1	1.19	1.39	1.27	0.92	0.76	0.6	0.86	0.88	0.84	1.09	0.73
AtIAA13	1	1.77	3.76	3.84	1.05	1.1	1.03	1.06	1.24	0.93	0.93	0.96
AtIAA14	1	0.99	1.74	3.38	1.25	2.24	1.6	1.54	1.24	0.88	0.78	1.07
AtIAA16	1	1.24	1.18	1.49	1.23	0.76	0.73	1.03	1.3	0.92	0.9	1.07
AtIAA17	1	1.17	1.03	1.28	0.92	0.96	0.84	0.91	1.12	1.03	0.81	0.9
AtIAA18	1	0.86	1.07	1.38	1.02	0.94	0.94	1.53	1.16	0.97	0.69	0.79
AtIAA19	1	5.62	18.49	12.48	1.11	1.09	0.72	1.17	0.67	0.82	0.87	0.54
AtIAA20	1	0.8	0.96	0.94	2.0	1.41	1.43	1.54	0.4	0.77	1.22	1.66
AtIAA26	1	0.98	1.05	1.49	1.21	1.06	1.09	1.28	1.3	1.32	0.99	0.82
AtIAA27	1	0.98	1.1	0.79	0.91	0.59	0.63	1.0	1.76	1.22	1.16	0.6
AtIAA28	1	1.05	0.84	0.68	0.68	0.98	1.41	0.67	0.78	1.18	0.96	0.48
AtIAA29	1	4.22	12.39	17.92	1.16	1.37	1.19	0.77	0.86	1.41	2.69	2.72
AtIAA30	1	1.97	5.62	9.06	1.08	2.59	1.62	1.08	0.89	1.68	0.99	1.1
AtIAA31	1	0.82	0.76	1.07	0.99	0.94	0.75	0.91	0.76	0.79	1.5	0.77
AtIAA33	1	0.85	1.51	0.94	0.92	1.43	0.59	0.94	0.67	0.9	1.09	1.41
AtIAA34	1	1.45	2.08	1.83	0.5	1	1.08	0.6	0.63	0.74	1.49	0.56
The expression data of AtIAA genes in various tissues,the numbers reflect the degrees of the expression level.
